# Supplementary material
Source: PubMed Central journal article supplement (PMC3416202)
Supplement: MCB.00282-12_zmb999109562so1.pdf [file MCB.00282-12_zmb999109562so1.pdf]

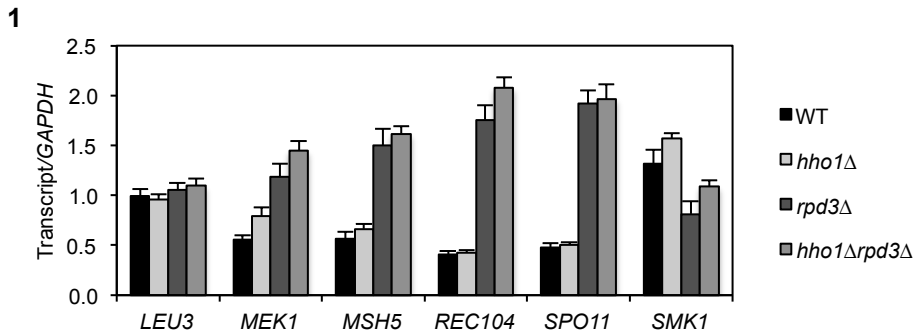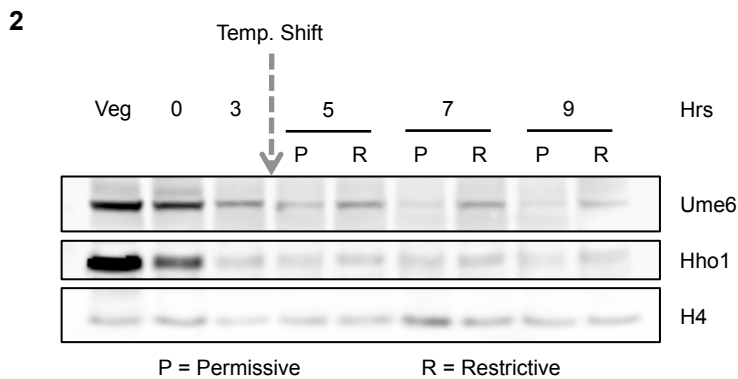

## Supplemental Figures

1. RT-qPCR reveals an additive effect of *hho1*Δ and *rpd3*Δ mutants in the de-repression of genes that are repressed by Ume6 in vegetatively growing haploid cells (*MEK1*, *MSH5*, *REC104*, and *SPO11*). *SMK1* is a middle sporulation gene that is not repressed by the Ume6 complex and *LEU3* is a constitutively active gene. All transcripts are normalized to *GAPDH*. Error bars represent standard error of the mean (SEM).

2. Western blot analysis of protein extracts from *cdc16-1* temperature sensitive mutant yeast harvested at different times over sporulation was carried out for Hho1 and Ume6. Cdc16 is an essential component of the APC complex. Cells were induced to sporulate and kept at the permissive temperature (23°C) or shifted to the restrictive temperature (34.5°C) after the onset of meiosis. Unlike Ume6, Hho1 is depleted in the absence of a functional APC complex.
